# Supplementary material
Source: Royal Society of Chemistry journal article supplement (doi:10.1039/d6tc00940a)
Supplement: d6tc00940a1.pdf [file d6tc00940a1.pdf]

## *Electronic Supplementary Information for*

### **Promoting the surface catalytic oxidation activity of MOF-derived Co<sub>3</sub>O<sub>4</sub> rectangular rods via Cr-doping for ppb-level xylene detection**

Keyi Ge,<sup>a</sup> Baijun Fang,<sup>a</sup> Wei Yang,<sup>\*a</sup> Quanquan Mo,<sup>a</sup> Ting Shan,<sup>a</sup> Fei Huang<sup>\*a</sup> and Hu  
Meng<sup>\*b</sup>

<sup>a</sup> State Key Laboratory of Green and Efficient Development of Phosphorous Resource, School of Chemistry and Environmental Engineering, Wuhan Institute of Technology, Wuhan 430205, China.

<sup>b</sup> Key Department of Instrumentation and Analytical Chemistry, CAS Key Laboratory of Separation Science for Analytical Chemistry, Dalian Institute of Chemical Physics, Chinese Academy of Sciences (CAS), Dalian 116023, China.

\*Corresponding author (E-mail): yangw@wit.edu.cn (W. Yang); 04002152@wit.edu.cn (F. Huang); menghu@dicp.ac.cn (H. Meng).

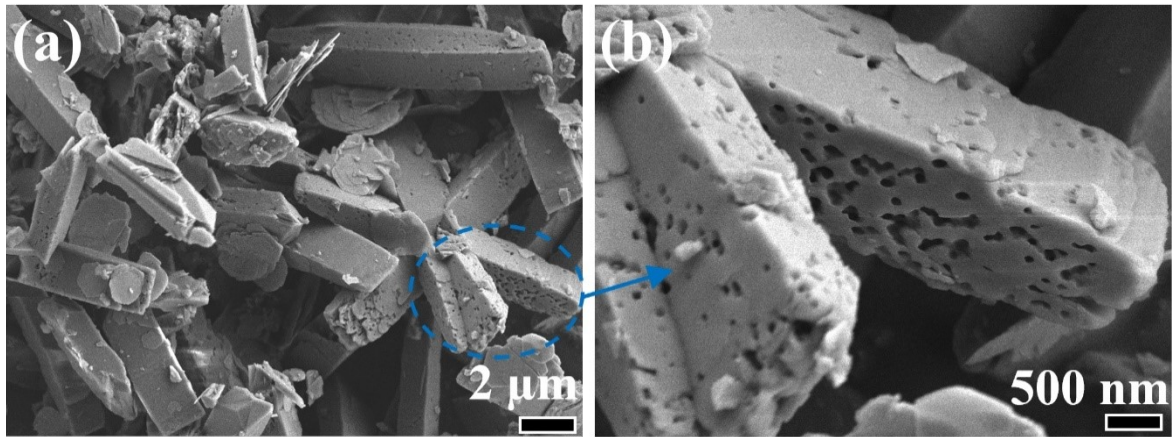

**Fig. S1** FESEM images of (a, b) the pure Co-MOF precursor.

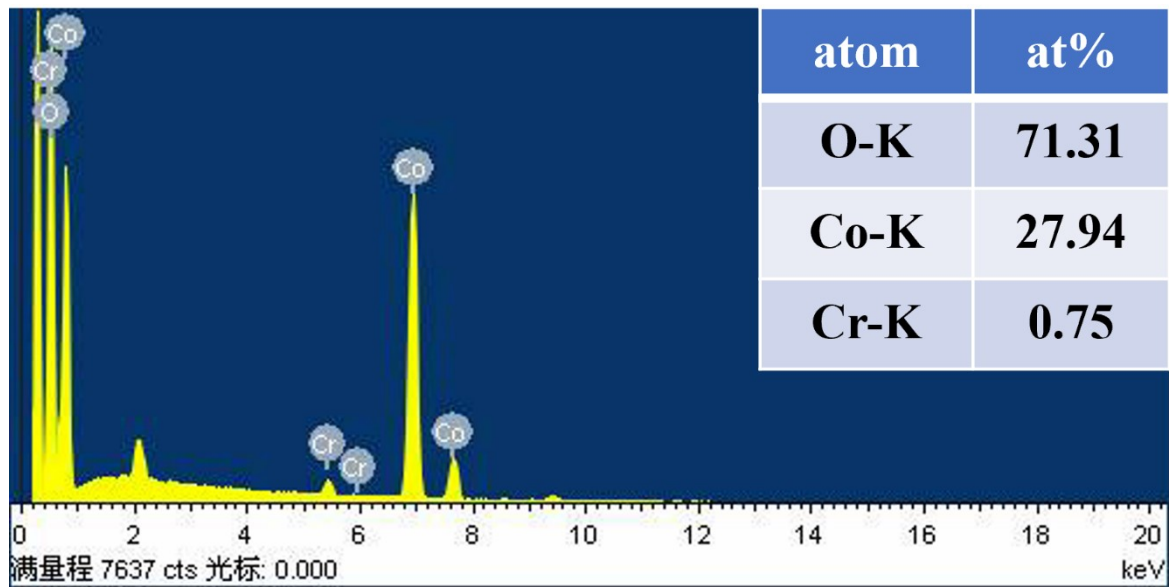

**Fig. S2** EDS elemental analysis of the 3 at% Cr-Co<sub>3</sub>O<sub>4</sub> sample.

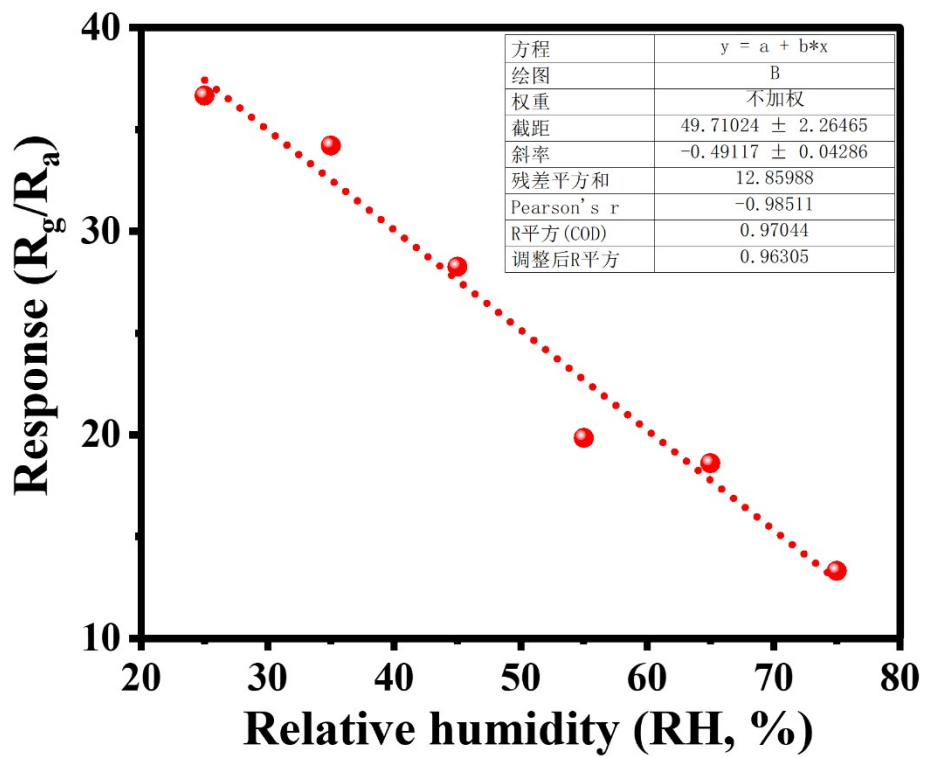

Fig. S3 Linear relationship of the  $R_g/R_a$  ratio vs RHs.

### Calculation of the theoretical limit of detection (LOD)

The noise value for the sensor was calculated using the variation in the relative sensor response in the baseline level using the root-mean-square (RMS) deviation. 50 points obtained from Fig. 5a before exposed to xylene were averaged and a standard deviation ( $S^2$ ) was gathered as 0.002704. The RMS noise can be calculated as following formula:

$$RMS_{noise} = \sqrt{S^2/N} \quad (N = 50)$$

The RMS noise was calculated to be 0.007354

According to the IUPAC definition, the signal (S) to noise (N) ratio (S/N) is 3, and the slope is 0.6968 from inset of Fig. 5c, therefore, the theoretic limit of detection (LOD) can be calculated as following:

$$LOD = 3 * (RMS_{noise} / Slope) = 3 * (0.007354 / 0.6968) = 0.03166 \text{ ppm} = 31.7 \text{ ppb}$$
